# Supplementary material
Source: publisher figshare collection journal article supplement (https://sage.figshare.com/ndownloader/files/12370796)
Supplement: Supplementary file 1 [file 12370796]

**Appendix Table 1. Initial Steps in Selecting Observations from HCCI Physician Data**

| 1    |                                                                                                                                    | 2                                 | 3                         | 4                                 | 5                     | 6                                                |
|------|------------------------------------------------------------------------------------------------------------------------------------|-----------------------------------|---------------------------|-----------------------------------|-----------------------|--------------------------------------------------|
| Step |                                                                                                                                    | Number of Claim-Line Observations | Number of Unique Patients | Number of Unique Providers (NPIs) | Number of Unique MSAs | Percentage of Observations Excluded in This Step |
|      |                                                                                                                                    |                                   |                           |                                   |                       |                                                  |
| 1    | Started with physician file for 2014                                                                                               | 891,455,768                       | 38,757,204                | 1,539,221                         | 389                   |                                                  |
| 2    | Excluded services provided by non-physicians (such as nurses, chiropractors, and dentists)*                                        | 773,048,237                       | 37,622,093                | 1,233,947                         | 389                   | 13.3                                             |
| 3    | Excluded claim-lines for pharmaceuticals, home health care, durable medical equipment, ambulance services, and laboratory services | 617,350,067                       | 37,400,175                | 1,229,685                         | 389                   | 17.5                                             |
| 4    | Limited to services delivered in physician offices, hospital inpatient and outpatient departments, and ambulatory surgical centers | 547,787,570                       | 36,506,550                | 1,156,562                         | 389                   | 7.8                                              |
| 5    | Excluded pediatricians and anesthesiologists                                                                                       | 484,069,676                       | 33,341,793                | 1,059,884                         | 389                   | 7.1                                              |
| 6    | Dropped secondary payer claims                                                                                                     | 463,318,505                       | 32,858,391                | 1,041,762                         | 389                   | 2.3                                              |
| 7    | Dropped claims for NPIs that provide fewer than 50 claim-lines in a year                                                           | 448,023,605                       | 32,358,224                | 723,353                           | 389                   | 1.7                                              |
| 8    | Dropped missing CPT codes and claims for physicians with invalid NPIs                                                              | 447,753,482                       | 32,356,438                | 723,279                           | 389                   | 0.0                                              |
| 9    | Dropped non-MSAs and U.S. Territories                                                                                              | 415,637,464                       | 30,885,323                | 669,331                           | 381                   | 3.6                                              |

Table summarizes the percentage of claim-lines, patients, providers, and MSAs included in each step of study sample selection. Column 6 summarizes the percentage change in the number of observations from the previous step.

\*\* Excluded non-physician specialties include chiropractors, dentists and dental technicians, orthodontists, prosthodontists, periodontists, registered nurses, social workers, speech therapists, community support specialists, and home aides.

CPT=current procedural terminology; MSA=metropolitan statistical areas; NPI= national provider identifier.

**Appendix Table 2. Selection of Commercial and Medicare Advantage Observations from Initial Sample**

|                           | 1                                                                                                                     | 2                                 | 3                         | 4                                 | 5                                                |
|---------------------------|-----------------------------------------------------------------------------------------------------------------------|-----------------------------------|---------------------------|-----------------------------------|--------------------------------------------------|
| Step                      |                                                                                                                       | Number of Claim-Line Observations | Number of Unique Patients | Number of Unique Providers (NPIs) | Percentage of Observations Excluded in This Step |
| Commercial Sample         |                                                                                                                       |                                   |                           |                                   |                                                  |
| 1                         | Restricted to patients ages 18-64 and patients with valid gender and age data                                         | 261,610,108                       | 21,085,795                | 630,428                           |                                                  |
| 2                         | Restricted to commercial insurance (excluded Medicare Advantage)                                                      | 247,174,823                       | 20,454,169                | 619,349                           | 5.5                                              |
| 3                         | Restricted to large and small-group plans (excluded individual market)                                                | 230,406,831                       | 18,840,225                | 606,388                           | 6.4                                              |
| 4                         | Excluded beneficiaries who were enrolled in both a commercial policy and a Medicare Advantage policy during the year. | 230,320,130                       | 18,833,560                | 606,368                           | 0.0                                              |
| 5                         | Kept only patients in EPO, HMO, PPO, or POS plans (excluded unclassified and indemnity plans)                         | 229,480,669                       | 18,777,707                | 605,640                           | 0.3                                              |
| Medicare Advantage Sample |                                                                                                                       |                                   |                           |                                   |                                                  |
| 1                         | Kept patients ages 65 or older and patients with valid gender and age data                                            | 126,183,773                       | 5,844,084                 | 536,150                           |                                                  |
| 2                         | Restricted to Medicare Advantage plans (excluded commercially insured)                                                | 93,387,694                        | 4,033,719                 | 470,574                           | 26.0                                             |
| 3                         | Excluded beneficiaries who were enrolled in both a commercial policy and a Medicare Advantage policy during the year. | 93,073,787                        | 4,015,334                 | 470,261                           | 0.2                                              |
| 4                         | Kept only patients in EPO, HMO, PPO, or POS plans (excluded private-fee-for-service plans)                            | 89,962,101                        | 3,863,904                 | 468,206                           | 2.5                                              |

Roughly 63 percent of the 415 million claim-lines selected in the initial sample were provided to patients 18-64 years old. Roughly 30 percent of the initial sample of claim-lines was provided to patients age 65 or older. Both samples include 381 MSAs.

EPO=exclusive provider organization; HMO=health maintenance organization; MA=Medicare Advantage; MSA=metropolitan statistical areas; NPI= national provider identifier; POS=point of service plans; PPO=preferred provider organization.

**Appendix Table 3. Physician Services Included in Analysis and Descriptive Statistics**

| CPT Code                   | Service                                                                                                                    | Most Common Provider Specialty                                  | Most Common Setting                                                                               |
|----------------------------|----------------------------------------------------------------------------------------------------------------------------|-----------------------------------------------------------------|---------------------------------------------------------------------------------------------------|
| <b>Surgical Services</b>   |                                                                                                                            |                                                                 |                                                                                                   |
| 17311                      | Mohs micrographic surgery                                                                                                  | Dermatology                                                     | Physician office                                                                                  |
| 19083                      | Image-guided breast biopsy                                                                                                 | Radiology                                                       | Hospital outpatient dept. or ASC                                                                  |
| 27447                      | Total knee arthroplasty (knee replacement)                                                                                 | Orthopedics                                                     | Hospital inpatient dept.                                                                          |
| 27130                      | Total hip arthroplasty (hip replacement)                                                                                   | Orthopedics                                                     | Hospital inpatient dept.                                                                          |
| 29881                      | Knee arthroscopy and surgery                                                                                               | Orthopedics                                                     | Hospital outpatient dept. or ASC                                                                  |
| 45385                      | Colonoscopy with tumor or lesion removal                                                                                   | Gastroenterology                                                | Hospital outpatient dept. or ASC                                                                  |
| 47562                      | Laparoscopic cholecystectomy (gallbladder surgery)                                                                         | General surgery                                                 | Hospital outpatient dept. or ASC                                                                  |
| 58558                      | Surgical hysteroscopy with biopsy or polypectomy                                                                           | Obstetrics and gynecology                                       | Hospital outpatient dept. or ASC                                                                  |
| 66984                      | Cataract removal with intraocular lens insertion                                                                           | Ophthalmology                                                   | Hospital outpatient dept. or ASC                                                                  |
| <b>Radiologic Services</b> |                                                                                                                            |                                                                 |                                                                                                   |
| 70553                      | Brain MRI, with and without contrast                                                                                       | Radiology                                                       | Hospital outpatient dept. or ASC                                                                  |
| 74183                      | Abdominal MRI, with and without contrast                                                                                   | Radiology                                                       | Hospital outpatient dept. or ASC                                                                  |
| 77418                      | IMRT                                                                                                                       | Therapeutic radiology                                           | Physician office                                                                                  |
| 78815                      | Tumor imaging, PET with concurrently acquired CT*                                                                          | Radiology                                                       | Hospital outpatient dept. or ASC                                                                  |
| <b>Medical Services</b>    |                                                                                                                            |                                                                 |                                                                                                   |
| 92928                      | Percutaneous transcatheter placement of intracoronary stent(s), with coronary angioplasty when performed (stent placement) | Cardiology                                                      | Hospital outpatient dept. or ASC (commercial), hospital inpatient department (Medicare Advantage) |
| 93000                      | EKG, 12 leads, interpretation and report, office-based                                                                     | Internal medicine (commercial), cardiology (Medicare Advantage) | Physician office                                                                                  |
| 93458                      | Catheter placement for coronary artery(s) for coronary angiography, with left heart catheterization                        | Cardiology                                                      | Hospital outpatient dept. or ASC                                                                  |
| 99203                      | New patient office visit, low to moderate complexity                                                                       | Family practice (commercial), orthopedics (Medicare Advantage)  | Physician office                                                                                  |
| 99213                      | Established patient office visit, low to moderate complexity                                                               | Family practice                                                 | Physician office                                                                                  |
| 99214                      | Established patient office visit, moderate to high complexity                                                              | Family practice                                                 | Physician office                                                                                  |
| 99232                      | Subsequent hospital care, intermediate intensity                                                                           | Internal medicine                                               | Hospital inpatient dept.                                                                          |

The table summarizes the services studied in this analysis, the top specialty providing each service, and top setting for each service. Unless otherwise noted, the most common provider specialty and most common setting are the same for the commercial and MA population.

\*PET/CT scans include only the professional component of this code, as the technical component is priced by individual Medicare carriers in the Medicare FFS program.

**Figure 1. The Percentage of Physicians' Spending Accounted for by Each Service**

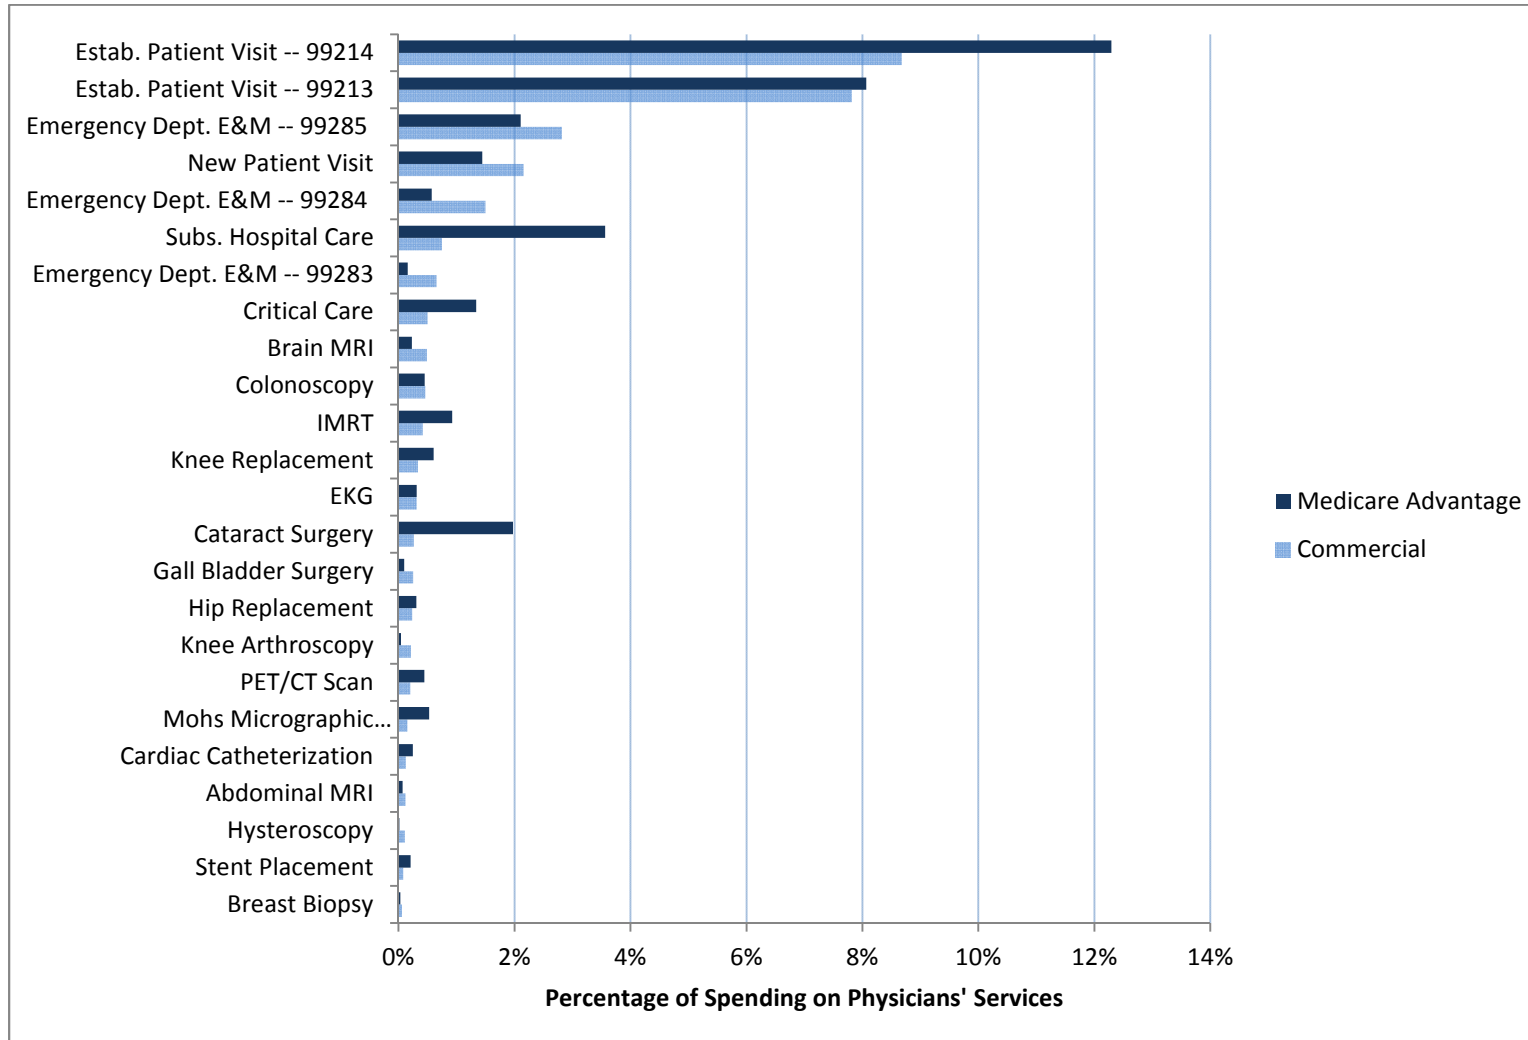

The figure summarizes the percentage of spending of physicians' services in the HCCI data that is accounted for by each service in each population (commercial or MA).

## **Variation in Physician Prices across MSAs**

We analyzed price variation across MSAs by calculating the average ratio of private to Medicare FFS prices for each service in each MSA in both populations.<sup>1</sup> The average ratios of commercial to Medicare FFS prices varied substantially from one MSA to another; the average ratios of Medicare Advantage to Medicare FFS prices varied much less. For example, the average commercial price for hip replacements in the MSA at the 10th percentile was 24 percent higher than Medicare FFS, while the average price in the MSA at the 90th percentile was 2.7 times higher than Medicare FFS. As a result, price ratios varied more than twofold across MSAs. We observed similar variation for all 20 services in the commercial population. Average commercial price ratios in the 90th-percentile MSA were 50 percent higher than the average ratios in the 10th-percentile MSA for all services, and twice as high for 10 of the 20 services (Figure 2). In contrast, the average ratios of MA prices to Medicare FFS prices varied much less across MSAs. For example, the average MA price for hip replacements in the 10th-percentile MSA was 3 percent lower than Medicare FFS and 6 percent higher in the 90th-percentile MSA. Thus, there was only a 9 percent difference between the most and least expensive areas in MA prices for hip replacements, compared with the more than twofold difference in commercial prices. For all services, the average ratio of MA to Medicare FFS prices in the 90th-percentile MSA was at most 24 percent higher than the price ratio in the 10th-percentile MSA.

## **Variation in Prices Across Physicians Within MSAs**

To describe how prices varied among physicians within MSAs, we calculated the median ratio of private to Medicare FFS prices for each service and each physician within an MSA.<sup>2</sup> (We summarized physician-level prices using medians because many doctors provided a small number of each service and averages could be sensitive to outliers.)

There was limited variation in median price ratios among physicians within MSAs in MA; in contrast, commercial price ratios varied substantially. For instance, for brain MRIs in Chicago in the commercial sample, the physician in the 10th percentile of price ratios was paid 25 percent more than Medicare FFS, while the physician at the 90th percentile was paid more than four times the Medicare FFS price (Appendix Table 4). In contrast, for brain MRIs in Chicago in MA, the physician at the 10th percentile of price ratios was paid 9 percent less than Medicare FFS, and the physician at the 90th percentile was paid exactly the Medicare FFS price (Appendix Table 5). Thus, there was only a 10 percent difference between the 90th and 10th percentile physicians in Chicago in MA, compared to a threefold difference between commercial physicians.

To systematically characterize price variation across physicians within MSAs, we calculated the percentage of MSAs for which price ratios for the 90th-percentile physician were at least 50 percent higher than price ratios for 10th-percentile physician. In MA, fewer than half of all MSAs had such variation (Figure 3). The service with the most variation was breast biopsies, for which the 90th percentile physician was at least 50 percent more expensive than the 10th-

---

<sup>1</sup> To ensure that averages were not influenced by a small number of observations, we included only MSAs for which there were more than 25 observations from at least five providers for this portion of analysis.

<sup>2</sup> To reduce the probability that variation within MSAs was driven by outliers, we restricted the sample for that analysis to physicians who provided at least five observations in an MSA for each population and service. We then restricted analysis to MSAs and services with at least five physicians and 50 observations.

percentile physician in 45 percent of MSAs. For all other services in MA, we observed such variation in less than a third of MSAs.<sup>3</sup>

In contrast, more than half of all MSAs had a 50 percent difference between providers in the 10th and 90th percentile in the commercial sample. For cataract surgery—the service that varied the least across providers—the 90th percentile provider was 50 percent more expensive than the 10th percentile provider in 53 percent of MSAs. For brain MRIs—the service that varied the most—providers in the 90th percentile were 50 percent more expensive than those in the 10th percentile in 87 percent of MSAs.

## **Analysis of Coefficient of Variation**

Throughout this analysis, we report price variation using the ratios of private to Medicare FFS prices. The advantage of this approach is that Medicare FFS prices are adjusted for a range of considerations (including variation in input costs across areas, the type of provider administering the service, or whether a physician provides multiple related services in a day), and thus, variation in prices due to those factors should be reduced. However, a concern with this approach is that, if private payers apply different adjustment to prices than Medicare FFS, dividing private prices by Medicare FFS might increase variation in prices, rather than reduce it. To test whether dividing private prices by Medicare FFS prices increased variation, we compared the coefficients of variation for private prices to the coefficients of variation for the ratios of private to Medicare FFS prices (see Appendix Table 6 and Appendix Table 7).

Dividing commercial prices by Medicare FFS prices did not increase coefficients of variation for most services. For some services, variation decreased substantially; for instance, variation in prices for brain MRIs decreased by roughly 40 percent. For other services (IMRT, PET/CT), variation in prices and price ratios was virtually the same. In the commercial population, variation increased for only two services, and those increases were relatively small: 6 percent for gall bladder surgery and 2 percent for stent placement.

Dividing Medicare Advantage prices by Medicare FFS prices generally decreased variation, and that variation decreased by more than in the commercial sample. For some services, such as MRI and hip replacement, coefficients of variation for price ratios were two or three times smaller than coefficients of variation for prices. Dividing Medicare Advantage prices by Medicare FFS prices increased the coefficients of variation for only one service—subsequent hospital care—and the coefficients of variation for that service increased only by 3 percent.

Those results suggest that Medicare Advantage prices reflect Medicare FFS price adjustments more closely than commercial prices do, and that describing price variation in terms of the ratios of private to Medicare FFS prices is generally a reasonable approach.

---

<sup>3</sup> Knee arthroscopy and hysteroscopy were omitted from this portion of analysis for MA because fewer than 5 MSAs met our sample restrictions.

**Figure 2. Variation Across MSAs in the Average Ratios of Private Prices to Medicare FFS Prices**  
Commercial Medicare Advantage

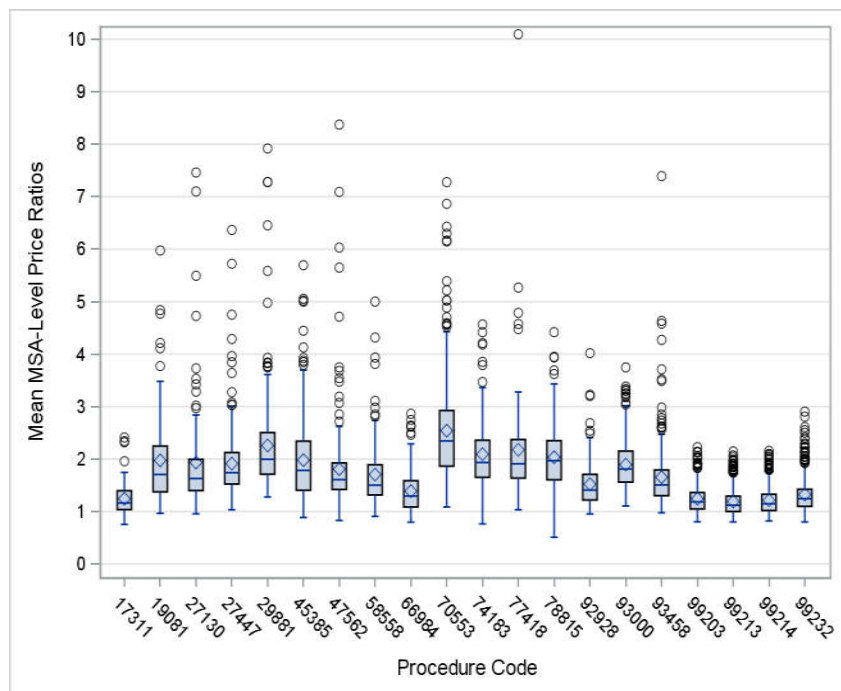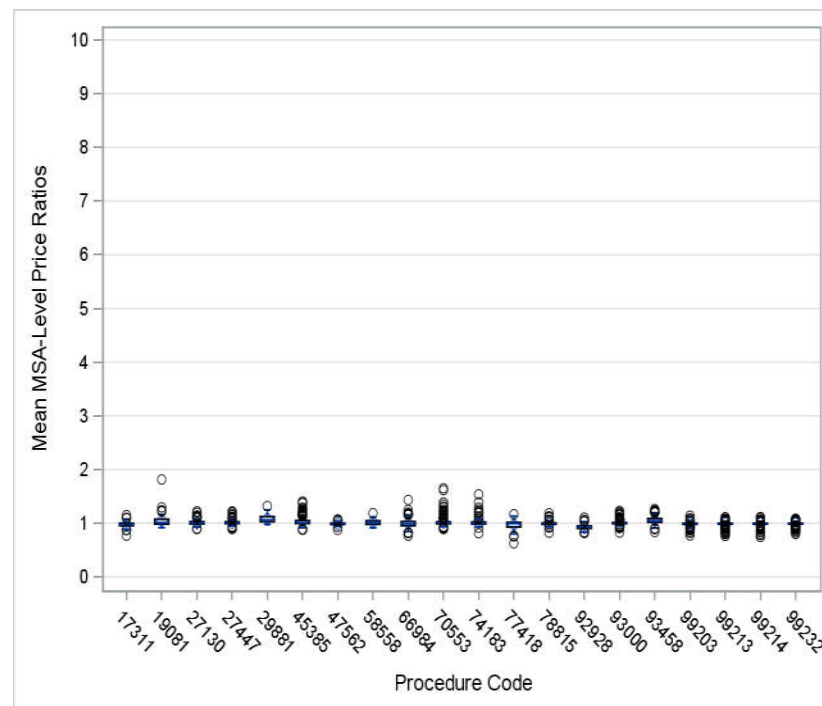

| Procedure codes                   |                              |                         |                                     |
|-----------------------------------|------------------------------|-------------------------|-------------------------------------|
| 17311 = Mohs Micrographic Surgery | 45385 = Colonoscopy          | 74183 = Abdominal MRI   | 93458 = Cardiac Catheterization     |
| 19081 = Breast Biopsy             | 47562 = Gall Bladder Surgery | 77418 = IMRT            | 99203 = New Patient Office Visit    |
| 27130 = Hip Replacement           | 58558 = Hysteroscopy         | 78815 = PET/CT scan     | 99213 = Estab. Patient Office Visit |
| 27447 = Knee Replacement          | 66984 = Cataract Surgery     | 92928 = Stent Placement | 99214 = Estab. Patient Office Visit |
| 29881 = Knee Arthroscopy          | 70553 = Brain MRI            | 93000 = EKG             | 99232 = Subsequent Hospital Care    |

Data were limited to all MSAs with at least 25 claim-lines and at least five distinct providers for each service in each population. The edges of each box are the 25th and 75th percentiles, respectively; the middle line is the median MSA; the mean is marked by a diamond. The upper and lower fences end at 1.5 times the interquartile range above and below the 25th and 75th percentiles. Outliers outside those ranges are indicated by dots. Average prices include both in- and out-of-network observations.

**Appendix Table 4. Variation in Ratios of Commercial Prices to Medicare FFS Prices Across Providers Within Select Metropolitan Areas**

|                           | Commercial Prices Relative to FFS Prices | Chicago-Naperville-Elgin, IL-IN-WI | Cincinnati, OH-KY-IN | Dallas-Fort Worth-Arlington, TX | Miami-Fort Lauderdale-West Palm Beach, FL | New York-Newark-Jersey City, NY-NJ-PA |
|---------------------------|------------------------------------------|------------------------------------|----------------------|---------------------------------|-------------------------------------------|---------------------------------------|
| Colonoscopy               | Number of Providers                      | 313                                | 87                   | 254                             | 225                                       | 801                                   |
|                           | 10th Percentile                          | 1.07                               | 0.98                 | 1.17                            | 0.71                                      | 0.86                                  |
|                           | 90th Percentile                          | 2.14                               | 1.70                 | 2.69                            | 1.49                                      | 2.40                                  |
|                           | Ratio of 90th to 10th Percentiles        | 2.01                               | 1.73                 | 2.30                            | 2.11                                      | 2.79                                  |
| Cataract Surgery          | Number of Providers                      | 145                                | 46                   | 133                             | 82                                        | 283                                   |
|                           | 10th Percentile                          | 0.96                               | 0.94                 | 1.08                            | 0.64                                      | 0.81                                  |
|                           | 90th Percentile                          | 1.60                               | 1.42                 | 1.43                            | 1.19                                      | 1.88                                  |
|                           | Ratio of 90th to 10th Percentiles        | 1.66                               | 1.52                 | 1.33                            | 1.87                                      | 2.33                                  |
| Brain MRI                 | Number of Providers                      | 347                                | 60                   | 270                             | 172                                       | 553                                   |
|                           | 10th Percentile                          | 1.25                               | 1.64                 | 1.28                            | 0.97                                      | 0.82                                  |
|                           | 90th Percentile                          | 4.09                               | 2.58                 | 3.97                            | 2.40                                      | 3.63                                  |
|                           | Ratio of 90th to 10th Percentiles        | 3.27                               | 1.57                 | 3.11                            | 2.47                                      | 4.45                                  |
| Established Patient Visit | Number of Providers                      | 11,053                             | 3,086                | 6,755                           | 5,925                                     | 25,780                                |
|                           | 10th Percentile                          | 0.84                               | 0.72                 | 0.93                            | 0.58                                      | 0.64                                  |
|                           | 90th Percentile                          | 1.57                               | 1.38                 | 1.55                            | 1.31                                      | 1.67                                  |
|                           | Ratio of 90th to 10th Percentiles        | 1.87                               | 1.92                 | 1.66                            | 2.27                                      | 2.59                                  |

Table summarizes median, provider-level price ratios within five MSAs, selected for having the most providers in one of the two populations. Analysis excludes providers with fewer than 5 claims and includes only MSAs with at least 50 claim-lines and at least 5 distinct providers for each service in each population. Average prices include both in- and out-of-network observations.



**Appendix Table 5. Variation in Ratios of Medicare Advantage to Medicare FFS Prices Across Providers Within Select Metropolitan Areas**

|                              | Medicare Advantage Prices<br>Relative to FFS Prices | Chicago-Naperville-<br>Elgin,<br>IL-IN-WI | Cincinnati,<br>OH-KY-IN | Dallas-Fort<br>Worth-Arlington,<br>TX | Miami-Fort<br>Lauderdale-West<br>Palm Beach, FL | New<br>York-Newark-<br>Jersey<br>City, NY-NJ-PA |
|------------------------------|-----------------------------------------------------|-------------------------------------------|-------------------------|---------------------------------------|-------------------------------------------------|-------------------------------------------------|
| Colonoscopy                  | Number of Providers                                 | 166                                       | 81                      | 129                                   | 108                                             | 358                                             |
|                              | 10th Percentile                                     | 0.90                                      | 0.94                    | 1.00                                  | 0.75                                            | 0.63                                            |
|                              | 90th Percentile                                     | 1.03                                      | 1.00                    | 1.76                                  | 1.00                                            | 1.00                                            |
|                              | Ratio of 90th to 10th<br>Percentiles                | 1.14                                      | 1.06                    | 1.77                                  | 1.34                                            | 1.59                                            |
| Cataract<br>Surgery          | Number of Providers                                 | 231                                       | 54                      | 136                                   | 127                                             | 491                                             |
|                              | 10th Percentile                                     | 0.80                                      | 0.94                    | 1.00                                  | 0.65                                            | 0.74                                            |
|                              | 90th Percentile                                     | 1.01                                      | 1.00                    | 1.05                                  | 1.00                                            | 1.00                                            |
|                              | Ratio of 90th to 10th<br>Percentiles                | 1.26                                      | 1.06                    | 1.05                                  | 1.54                                            | 1.35                                            |
| Brain MRIs                   | Number of Providers                                 | 134                                       | 48                      | 90                                    | 93                                              | 154                                             |
|                              | 10th Percentile                                     | 0.91                                      | 1.00                    | 0.85                                  | 0.58                                            | 0.80                                            |
|                              | 90th Percentile                                     | 1.00                                      | 1.10                    | 1.03                                  | 1.01                                            | 1.15                                            |
|                              | Ratio of 90th to 10th<br>Percentiles                | 1.10                                      | 1.10                    | 1.22                                  | 1.74                                            | 1.43                                            |
| Established<br>Patient Visit | Number of Providers                                 | 6,980                                     | 2,501                   | 4,244                                 | 3,614                                           | 15,641                                          |
|                              | 10th Percentile                                     | 1.00                                      | 0.91                    | 1.00                                  | 0.70                                            | 0.55                                            |
|                              | 90th Percentile                                     | 1.01                                      | 1.01                    | 1.06                                  | 1.01                                            | 1.01                                            |
|                              | Ratio of 90th to 10th<br>Percentiles                | 1.01                                      | 1.11                    | 1.06                                  | 1.44                                            | 1.83                                            |

Table summarizes median, provider-level price ratios within five MSAs, selected for having the most providers in one of the two populations. Analysis excludes providers with fewer than 5 claims and includes only MSAs with at least 50 claim-lines and at least 5 distinct providers for each service in each population. Average prices include both in- and out-of-network observations.

**Figure 3. Percentage of MSAs in Which the Ratio of Private to Medicare FFS Prices is at Least 50 Percent Greater for the 90th Percentile Provider Than the 10th Percentile Provider**

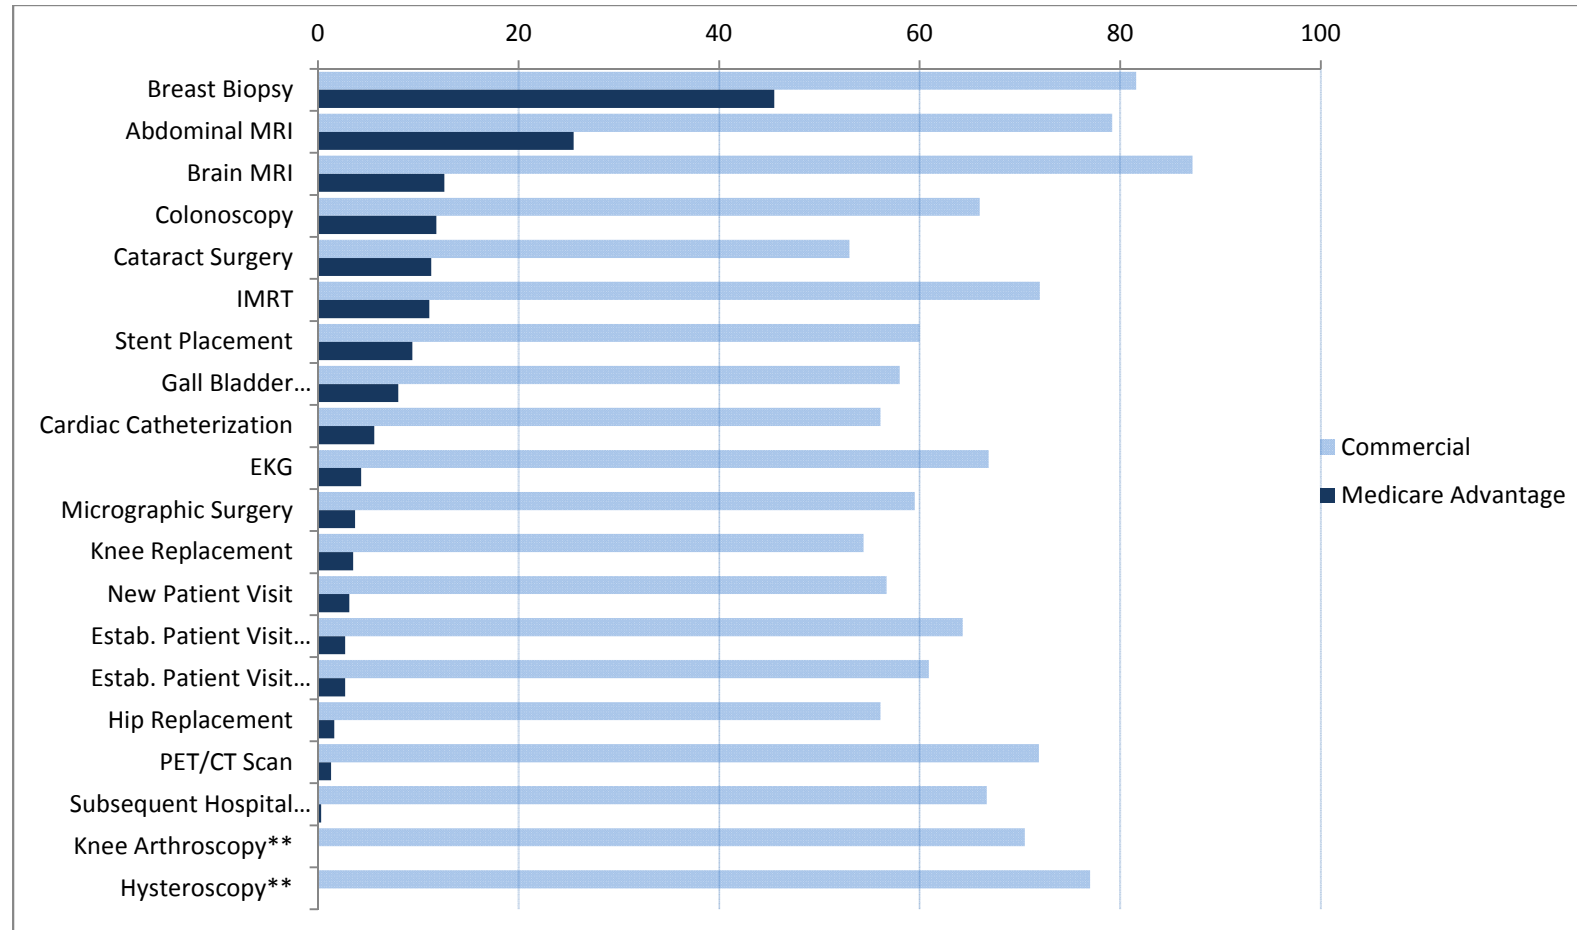

Analysis excludes providers with fewer than five claims and includes only MSAs with at least 50 claim-lines and at least five distinct providers for each service in each population. Average prices include both in- and out-of-network observations.

\*\* Knee arthroscopies and hysteroscopy were omitted from this portion of analysis for Medicare Advantage because there were fewer than five MSAs that met the sample restrictions in Medicare Advantage.

**Appendix Table 6. Comparison of Coefficients of Variation Between Medicare Advantage Prices and Price Ratios**

| Procedural Code | Service                   | Coefficient of Variation, Unit Prices | Coefficient of Variation, Ratios of Private to Medicare FFS Prices | Percentage Difference in Coefficients of Variation (%) |
|-----------------|---------------------------|---------------------------------------|--------------------------------------------------------------------|--------------------------------------------------------|
| 17311           | Mohs Micrographic Surgery | 29.0                                  | 23.5                                                               | -19                                                    |
| 19081           | Breast Biopsy             | 71.1                                  | 36.3                                                               | -49                                                    |
| 27130           | Hip Replacement           | 46.2                                  | 14.0                                                               | -70                                                    |
| 27447           | Knee Replacement          | 46.2                                  | 14.6                                                               | -68                                                    |
| 29881           | Knee Arthroscopy          | 33.3                                  | 31.3                                                               | -6                                                     |
| 45385           | Colonoscopy               | 22.9                                  | 17.5                                                               | -24                                                    |
| 47562           | Gall Bladder Surgery      | 32.4                                  | 8.2                                                                | -75                                                    |
| 58558           | Hysteroscopy              | 24.4                                  | 21.2                                                               | -13                                                    |
| 66984           | Cataract Surgery          | 20.2                                  | 15.7                                                               | -22                                                    |
| 70553           | Brain MRI                 | 82.6                                  | 23.8                                                               | -71                                                    |
| 74183           | Abdominal MRI             | 94.6                                  | 22.9                                                               | -76                                                    |
| 77418           | IMRT                      | 22.5                                  | 21.3                                                               | -6                                                     |
| 78815           | PET/CT Scan               | 10.1                                  | 9.4                                                                | -7                                                     |
| 92928           | Stent Placement           | 20.4                                  | 19.9                                                               | -3                                                     |
| 93000           | EKG                       | 16.4                                  | 14.6                                                               | -11                                                    |
| 93458           | Cardiac Catheterization   | 36.5                                  | 26.5                                                               | -27                                                    |
| 99203           | New Patient Visit         | 11.9                                  | 10.4                                                               | -13                                                    |
| 99213           | Estab. Patient Visit      | 12.8                                  | 11.4                                                               | -11                                                    |
| 99214           | Estab. Patient Visit      | 12.7                                  | 11.7                                                               | -8                                                     |
| 99232           | Subsequent Hospital Care  | 8.2                                   | 8.4                                                                | 3                                                      |

Table summarizes the coefficients of variation for private prices, coefficients of variation for the ratios of private to Medicare FFS prices, and the percentage difference in the coefficients of variation.

**Appendix Table 7. Comparison of Coefficients of Variation Between Commercial Prices and Price Ratios**

| Procedural Code | Service                   | Coefficient of Variation, Unit Prices | Coefficient of Variation, Ratios of Private to Medicare FFS Prices | Percentage Difference in Coefficient of Variation (%) |
|-----------------|---------------------------|---------------------------------------|--------------------------------------------------------------------|-------------------------------------------------------|
| 17311           | Mohs Micrographic Surgery | 46.0                                  | 40.7                                                               | -12                                                   |
| 19081           | Breast Biopsy             | 83.0                                  | 76.2                                                               | -8                                                    |
| 27130           | Hip Replacement           | 89.4                                  | 68.7                                                               | -23                                                   |
| 27447           | Knee Replacement          | 71.4                                  | 51.6                                                               | -28                                                   |
| 29881           | Knee Arthroscopy          | 70.1                                  | 62.7                                                               | -11                                                   |
| 45385           | Colonoscopy               | 54.2                                  | 52.7                                                               | -3                                                    |
| 47562           | Gall Bladder Surgery      | 93.2                                  | 98.6                                                               | 6                                                     |
| 58558           | Hysteroscopy              | 79.3                                  | 66.8                                                               | -16                                                   |
| 66984           | Cataract Surgery          | 42.6                                  | 42.2                                                               | -1                                                    |
| 70553           | Brain MRI                 | 102.2                                 | 59.6                                                               | -42                                                   |
| 74183           | Abdominal MRI             | 105.2                                 | 52.8                                                               | -50                                                   |
| 77418           | IMRT                      | 62.7                                  | 62.7                                                               | 0                                                     |
| 78815           | PET/CT Scan               | 51.4                                  | 51.3                                                               | 0                                                     |
| 92928           | Stent Placement           | 47.9                                  | 48.9                                                               | 2                                                     |
| 93000           | EKG                       | 43.9                                  | 42.4                                                               | -3                                                    |
| 93458           | Cardiac Catheterization   | 67.3                                  | 54.9                                                               | -18                                                   |
| 99203           | New Patient Visit         | 33.5                                  | 33.4                                                               | 0                                                     |
| 99213           | Estab. Patient Visit      | 34.8                                  | 34.3                                                               | -1                                                    |
| 99214           | Estab. Patient Visit      | 35.3                                  | 35.2                                                               | 0                                                     |
| 99232           | Subsequent Hospital Care  | 40.0                                  | 39.7                                                               | -1                                                    |

Table summarizes the coefficients of variation for private prices, coefficients of variation for the ratios of private to Medicare FFS prices, and the percentage difference in the coefficients of variation.
